# Supplementary material for: Clonal relatedness in tumour pairs of breast cancer patients
Source: Breast Cancer Res. 2018 Aug 9;20:96. doi: 10.1186/s13058-018-1022-y (PMC6085699; doi:10.1186/s13058-018-1022-y)
Supplement: Supplementary file 2 — Table S1. Overview of clinical characteristics of the patient and tumour information stratified by the clinical groups (BM, BS, IM, and IS). (XLSX 16 kb) [file 13058_2018_1022_MOESM2_ESM.xlsx]

## Sheet: Sheet1
Supplementary Table S1: Overview of clinical characteristics of the patient and tumour information stratified by the clinical groups (BM, BS, IM, and IS).
		No. of patients (%)
		Total	Stratified by clinical group				P
			BM	BS	IM	IS
Patient information
	Number of patients	37	9	8	9	11
	Follow-up time (average in days (SD))	2629.2 (2085.1)	2377.4 (1645.5)	2909.5 (2370.0)	2411.3 (1981.7)	2809.6 (2492.6)	0.935
	Breast cancer-specific death	16 (43.2)	5 (55.6)	3 (37.5)	6 (66.7)	2 (18.2)	0.139
	Age (average in years (SD))	65.0 (14.5)	58.8 (13.8)	62.0 (17.2)	67.7 (15.1)	69.9 (11.9)	0.321
Tumour information	Number of tumours	74	18	16	18	22
	Axillary lymph node status						0.001
	pN0	13 (31.0)	5 (38.5)	0 (0.0)	6 (85.7)	2 (14.3)
	pN1	29 (69.0)	8 (61.5)	8 (100.0)	1 (14.3)	12 (85.7)
	Not available	32	5	8	11	8
	Tumour size (average in mm (SD))	41.8 (45.42)	32.6 (15.7)	68.8 (80.4)	22.2 (4.4)	36.6 (17.8)	0.1
	Pathological tumour status						0.319
	pT1	5 (9.8)	3 (18.8)	0 (0.0)	1 (14.3)	1 (6.2)
	pT2	19 (37.3)	8 (50.0)	4 (33.3)	3 (42.9)	4 (25.0)
	pT3	27 (52.9)	5 (31.2)	8 (66.7)	3 (42.9)	11 (68.8)
	Not available	23	2	4	11	6
	Histology						0.217
	Ductal	32 (71.1)	11 (68.8)	9 (75.0)	4 (57.1)	8 (80.0)
	Lobular	8 (17.8)	5 (31.2)	2 (16.7)	1 (14.3)	0 (0.0)
	Other	5 (11.1)	0 (0.0)	1 (8.3)	2 (28.6)	2 (20.0)
	Not available	29	2	4	11	12
	ER						0.501
	Negative	22 (30.6)	6 (33.3)	3 (20.0)	4 (23.5)	9 (40.9)
	Positive	50 (69.4)	12 (66.7)	12 (80.0)	13 (76.5)	13 (59.1)
	Not available	2	0	1	1	0
	PR						0.433
	Negative	37 (51.4)	11 (61.1)	5 (33.3)	9 (52.9)	12 (54.5)
	Positive	35 (48.6)	7 (38.9)	10 (66.7)	8 (47.1)	10 (45.5)
	Not available	2	0	1	1	0
	HER2						0.208
	Negative	65 (87.8)	16 (88.9)	16 (100.0)	16 (88.9)	17 (77.3)
	Positive	9 (12.2)	2 (11.1)	0 (0.0)	2 (11.1)	5 (22.7)
	Ploidy						0.158
	Aneuploid	27 (55.1)	9 (60.0)	5 (55.6)	8 (72.7)	5 (35.7)
	Diploid	16 (32.7)	6 (40.0)	2 (22.2)	3 (27.3)	5 (35.7)
	Multiploid	6 (12.2)	0 (0.0)	2 (22.2)	0 (0.0)	4 (28.6)
	Not available	25	3	7	7	8
	Surgery						0.121
	Lumpectomy	15 (27.8)	5 (29.4)	1 (8.3)	5 (55.6)	4 (25.0)
	Mastectomy	39 (72.2)	12 (70.6)	11 (91.7)	4 (44.4)	12 (75.0)
	Not available	20	1	4	9	6
	Endocrine treatment						0.063
	No	16 (33.3)	8 (50.0)	0 (0.0)	3 (42.9)	5 (33.3)
	Yes	32 (66.7)	8 (50.0)	10 (100.0)	4 (57.1)	10 (66.7)
	Not available	26	2	6	11	7
	Radiotherapy						0.874
	No	33 (68.8)	10 (66.7)	8 (72.7)	4 (57.1)	11 (73.3)
	Yes	15 (31.2)	5 (33.3)	3 (27.3)	3 (42.9)	4 (26.7)
	Not available	26	3	5	11	7
	Chemotherapy						0.801
	No	37 (75.5)	11 (68.8)	8 (72.7)	6 (85.7)	12 (80.0)
	Yes	12 (24.5)	5 (31.2)	3 (27.3)	1 (14.3)	3 (20.0)
	Not available	25	2	5	11	7
	Subtype						0.702
	Basal-like	6 (20.7)	1 (33.3)	0 (0.0)	1 (11.1)	4 (28.6)
	HER2/ER-	4 (13.8)	1 (33.3)	0 (0.0)	1 (11.1)	2 (14.3)
	Luminal subtype B/HER2-	16 (55.2)	1 (33.3)	3 (100.0)	5 (55.6)	7 (50.0)
	Luminal subtype B/HER2+	3 (10.3)	0 (0.0)	0 (0.0)	2 (22.2)	1 (7.1)
	Not available	45	15	13	9	8
Categorical variables show the total number of patients and percentage in parentheses, while continuous variables are given as the mean and standard deviation. Statistically significant variables (P <0.05) are displayed in bold text. BM: bilateral-metachronous; BS: bilateral-synchronous, ER: oestrogen receptor status; HER2: human epidermal growth factor receptor 2 status; IM: ipsilateral-metachro…
